# Supplementary material
Source: PubMed Central journal article supplement (PMC3819456)
Supplement: NIHMS515956-supplement-01.pdf [file NIHMS515956-supplement-01.pdf]

## Supplementary material

Supplementary Table 1A  
Summary of patient characteristics for the initial study

| Sample ID                                           | Stage | Histology | Grade          | Age at diagnosis | Blood sample interval <sup>1,2</sup> (months) | Disease status at time of blood draw <sup>3</sup> | CA125 at time of blood draw (Normal $\leq$ 35) | Chemo status at time of blood draw | Time since diagnosis (months) |
|-----------------------------------------------------|-------|-----------|----------------|------------------|-----------------------------------------------|---------------------------------------------------|------------------------------------------------|------------------------------------|-------------------------------|
| <i>Patient 0067 No Recur</i>                        |       |           |                |                  |                                               |                                                   |                                                |                                    |                               |
| 36                                                  | 3C    | Serous    | Grade 3 (high) | 57               | 5                                             | Stable Disease                                    | 12                                             | post chemo                         | 5.4                           |
| 784                                                 |       |           |                |                  | 30                                            | NED                                               | 12                                             | post chemo                         | 29.9                          |
| 3812                                                |       |           |                |                  | 45                                            | NED                                               | 9                                              | post chemo                         | 44.8                          |
| <i>Patient 1525 No Recur</i>                        |       |           |                |                  |                                               |                                                   |                                                |                                    |                               |
| 1005                                                | 3C    | Serous    | Grade 3 (high) | 55               | 3                                             | Not Specified                                     | 3308                                           | in chemo                           | 3.4                           |
| 4012                                                |       |           |                |                  | 16                                            | NED                                               | 6                                              | post chemo                         | 16.2                          |
| 4715                                                |       |           |                |                  | 30                                            | NED                                               | 6                                              | post chemo                         | 30.2                          |
| <i>Patient 1905 No Recur</i>                        |       |           |                |                  |                                               |                                                   |                                                |                                    |                               |
| 1826                                                | 3C    | Serous    | Grade 3 (high) | 48               | 1                                             | EOD                                               | 17                                             | in chemo                           | 1.1                           |
| 4069                                                |       |           |                |                  | 10                                            | NED                                               | 7                                              | post chemo                         | 10.2                          |
| 4588                                                |       |           |                |                  | 22                                            | NED                                               | 15                                             | post chemo                         | 21.6                          |
| <i>Patient 1418 No Recur</i>                        |       |           |                |                  |                                               |                                                   |                                                |                                    |                               |
| 832                                                 | 3C    | Serous    | Grade 3 (high) | 56               | 11                                            | NED                                               | 24                                             | post chemo                         | 10.6                          |
| 3802                                                |       |           |                |                  | 24                                            | NED                                               | 28                                             | post chemo                         | 23.7                          |
| 4222                                                |       |           |                |                  | 35                                            | NED                                               | 26                                             | post chemo                         | 35.1                          |
| <i>Patient 3048 No Recur</i>                        |       |           |                |                  |                                               |                                                   |                                                |                                    |                               |
| 4629                                                | 3C    | Serous    | Grade 3 (high) | 54               | 0                                             | EOD                                               | 3852                                           | pre chemo                          | 0.0                           |
| 7428                                                |       |           |                |                  | 11                                            | Tol treatment                                     | 6                                              | in chemo                           | 10.9                          |
| 12350                                               |       |           |                |                  | 23                                            | NED                                               | 5                                              | post chemo                         | 23.0                          |
| <i>Patient 1115 Time To Recurrence: 8.9 months</i>  |       |           |                |                  |                                               |                                                   |                                                |                                    |                               |
| 674                                                 | 3C    | Serous    | Grade 3 (high) | 76               | -8.7                                          | EOD                                               | 185                                            | pre chemo                          | 0.3                           |
| 940                                                 |       |           |                |                  | 1.1                                           | NED                                               | 13                                             | post chemo                         | 10.1                          |
| 3909                                                |       |           |                |                  | 12.3                                          | EOD                                               | 71                                             | recur pre chemo                    | 21.3                          |
| <i>Patient 1295 Time To Recurrence: 29.2 months</i> |       |           |                |                  |                                               |                                                   |                                                |                                    |                               |
| 747                                                 | 3B    | Serous    | Grade 3 (high) | 42               | -28.4                                         | EOD                                               | 36                                             | pre chemo                          | 0.7                           |
| 1740                                                |       |           |                |                  | -16.3                                         | Not Specified                                     | 11                                             | post chemo                         | 12.9                          |
| 4258                                                |       |           |                |                  | 0.0                                           | EOD                                               | 18                                             | recur pre chemo                    | 29.2                          |
| <i>Patient 1379 Time To Recurrence: 18.9 months</i> |       |           |                |                  |                                               |                                                   |                                                |                                    |                               |
| 760                                                 | 4     | Serous    | Grade 3 (high) | 51               | -18.9                                         | EOD                                               | 810                                            | pre chemo                          | 0.0                           |
| 1681                                                |       |           |                |                  | -8.2                                          | Not Specified                                     | 25                                             | in chemo                           | 10.7                          |
| 3846                                                |       |           |                |                  | -2.6                                          | Not Specified                                     | 77                                             | post chemo                         | 16.3                          |
| <i>Patient 1511 Time To Recurrence: 24.4 months</i> |       |           |                |                  |                                               |                                                   |                                                |                                    |                               |
| 978                                                 | 3C    | Serous    | Grade 1 (low)  | 41               | -24.4                                         | EOD                                               | 85                                             | pre chemo                          | 0.0                           |
| 3905                                                |       |           |                |                  | -14.3                                         | NED                                               | 5                                              | post chemo                         | 10.1                          |
| 4531                                                |       |           |                |                  | 0.2                                           | EOD                                               | 23                                             | recur pre chemo                    | 24.6                          |
| <i>Patient 1444 Time To Recurrence: 19.8 months</i> |       |           |                |                  |                                               |                                                   |                                                |                                    |                               |
| 3776                                                | 3C    | Serous    | Grade 3 (high) | 52               | -9.5                                          | NED                                               | 6                                              | post chemo                         | 10.3                          |
| 4213                                                |       |           |                |                  | 1.7                                           | EOD                                               | 18                                             | recur pre chemo                    | 21.5                          |
| 4968                                                |       |           |                |                  | 14.0                                          | EOD                                               | 366                                            | recur pre chemo                    | 33.8                          |

<sup>1</sup>No Recurrence Blood Sample Interval = Months between blood draw and diagnosis.<sup>2</sup>Recurrence Blood Sample Interval = Months between blood draw and recurrence.<sup>3</sup>EOD = Evidence of Disease, NED = No Evidence of Disease, Tol treatment = tolerating treatment.

Supplementary Table 1B  
Summary of patient characteristics for the validation study

| Sample ID | Stage | Histology | Grade                  | Age at diagnosis | Blood sample interval <sup>4,5</sup> (months) | Disease status at time of blood draw <sup>6</sup> | CA125 at time of blood draw (Normal $\leq 35$ ) | Chemo status at time of blood draw | Time to recurrence (months) |
|-----------|-------|-----------|------------------------|------------------|-----------------------------------------------|---------------------------------------------------|-------------------------------------------------|------------------------------------|-----------------------------|
| 238       | 3C    | Serous    | Grade 2 (intermediate) | 47               | 20                                            | NED                                               | 13                                              | post chemo N/A <sup>7</sup>        |                             |
| 3713      | 3C    | Serous    | Grade 1 (low)          | 48               | 51                                            | NED                                               | 9                                               | post chemo                         | N/A                         |
| 4345      | 4     | Serous    | Grade 3 (high)         | 79               | 25                                            | NED                                               | 13                                              | post chemo                         | N/A                         |
| 4670      | 3C    | Serous    | Grade 2 (intermediate) | 48               | 57                                            | NED                                               | 7                                               | post chemo                         | N/A                         |
| 12332     | 3C    | Serous    | Grade 3 (high)         | 55               | 30                                            | NED                                               | 8                                               | post chemo                         | N/A                         |
| 57        | 3C    | Serous    | Grade 2 (intermediate) | 65               | -3.0                                          | NED                                               | 15                                              | post chemo                         | 17.5                        |
| 58        | 3C    | Serous    | Grade 3 (high)         | 71               | -2.1                                          | Not Specified                                     | 67                                              | post chemo                         | 26.8                        |
| 279       | 3C    | Serous    | Grade 3 (high)         | 51               | -3.5                                          | NED                                               | 10                                              | post chemo                         | 11                          |
| 346       | 3     | Serous    | Grade 1 (low)          | 73               | -3.6                                          | NED                                               | 23                                              | post chemo                         | 14                          |
| 350       | 3C    | Serous    | Grade 3 (high)         | 65               | -15.4                                         | NED                                               | 19                                              | in chemo                           | 20.1                        |
| 356       | 3C    | Serous    | Not Specified          | 50               | -10.8                                         | Not Specified                                     | 31                                              | in chemo                           | 16.2                        |
| 358       | 3C    | Serous    | Not Specified          | 78               | -8.7                                          | NED                                               | 14                                              | post chemo                         | 22.9                        |
| 725       | 3C    | Serous    | Grade 3 (high)         | 69               | -7.3                                          | nd                                                | 17 *CA125 obtained 5 months prior               | post chemo                         | 18.2                        |
| 778       | 3C    | Serous    | Grade 1 (low)          | 41               | -10.6                                         | NED                                               | 22                                              | post chemo                         | 27.3                        |
| 807       | 3C    | Serous    | Grade 3 (high)         | 58               | -10.9                                         | NED                                               | 20                                              | post chemo                         | 19.1                        |
| 876       | 3C    | Serous    | Grade 3 (high)         | 47               | -10.03                                        | NED                                               | 16                                              | in chemo                           | 15.5                        |
| 1006      | 3C    | Serous    | Grade 1 (low)          | 46               | -6.5                                          | NED                                               | 4                                               | post chemo                         | 14.2                        |
| 1020      | 4     | Serous    | Grade 2 (intermediate) | 56               | -5.4                                          | NED                                               | 9                                               | post chemo                         | 15                          |
| 1385      | 3C    | Serous    | Not Specified          | 62               | -13.6                                         | Not Specified                                     | 30                                              | in chemo                           | 16                          |
| 3928      | 3C    | Serous    | Grade 3 (high)         | 47               | -10.4                                         | NED                                               | 8                                               | post chemo                         | 26.4                        |
| 3930      | 3C    | Serous    | Grade 3 (high)         | 63               | -6.1                                          | NED                                               | 6 *CA125 obtained 3 months prior                | post chemo                         | 25.7                        |
| 4066      | 3A    | Serous    | Grade 3 (high)         | 56               | -18.9                                         | NED                                               | 7                                               | post chemo                         | 31.7                        |
| 4197      | 3C    | Serous    | Not Specified          | 63               | -10.2                                         | NED                                               | 24                                              | post chemo                         | 39                          |
| 4221      | 3C    | Serous    | Grade 3 (high)         | 58               | -6.2                                          | NED                                               | 13                                              | post chemo                         | 25.7                        |
| 4487      | 4C    | Serous    | Grade 3 (high)         | 67               | -3.0                                          | NED                                               | 34                                              | post chemo                         | 12.9                        |
| 7323      | 3C    | Serous    | Grade 3 (high)         | 62               | -7.8                                          | NED                                               | 18                                              | post chemo                         | 18.1                        |
| 11243     | 3C    | Serous    | Grade 2 (intermediate) | 49               | -12.8                                         | NED                                               | 13                                              | in chemo                           | 18.3                        |
| 11331     | 3C    | Serous    | Grade 3 (high)         | 62               | -11.0                                         | NED                                               | 7                                               | post chemo                         | 36.2                        |
| 12362     | 3C    | Serous    | Grade 3 (high)         | 63               | -9.07                                         | NED                                               | 39                                              | post chemo                         | 14.1                        |
| 12387     | 3C    | Serous    | Grade 3 (high)         | 67               | -5.53                                         | NED                                               | 5                                               | in chemo                           | 12.1                        |

<sup>4</sup>No Recurrence Blood Sample Interval = Months between blood draw and diagnosis.

<sup>5</sup>Recurrence Blood Sample Interval = Months between blood draw and recurrence.

<sup>6</sup>EOD = Evidence of Disease, NED = No Evidence of Disease, Tol treatment = tolerating treatment.

<sup>7</sup>No clinical evidence of disease for > 48 months.

Supplementary Table S2  
Summary of statistical analyses for the initial study for selecting significant antigens

| Assays performed                          | Study population                 | Analyses                           |                                       | Statistically significant Ags                                                                                                         |
|-------------------------------------------|----------------------------------|------------------------------------|---------------------------------------|---------------------------------------------------------------------------------------------------------------------------------------|
|                                           |                                  | T-test                             | Wilcoxon rank sum (Mann-Whitney) test |                                                                                                                                       |
| 10 (at the first post diagnosis interval) | R vs NR<br>R (n = 5); NR (n = 5) | 17 Ags, (p < 0.05)                 | 15 Ags, (p < 0.05)                    | 4/17 Ags, 02Mec1_BP4_P3_A11, Mec1_1A3, Mec1_4B5, and Mec1_5C7 showed complete discrimination between R and NR groups                  |
|                                           | CA125 < 35 U/ml at 1 yr          | Overlapping Ags between 2 analyses | = 17                                  |                                                                                                                                       |
| 8*(at the first post diagnosis interval)  | R vs NR<br>R (n = 5); NR (n = 3) | 11 Ags, (p < 0.05)                 | 4 Ags, (p < 0.05)                     | 4/13 Ags, Mec1_1E1, Mec1_4B5, Mec1_5A7 and Mec1_5C7 completely discriminated 5R from 3 NR groups. MEC1_5C7 is the best discriminator. |
|                                           |                                  | Overlapping Ags between 2 analyses | = 13                                  |                                                                                                                                       |
| 9*(at the second post diagnosis interval) | R vs NR<br>R (n = 5); NR (n = 4) | 10 Ags, (p < 0.05)                 | 9 Ags, (p < 0.05)                     | 2/11 Ags, Mec1_5C12 and P156_BP4_P2_H3 completely discriminated 5 R from 4 NR.                                                        |
|                                           |                                  | Overlapping Ags between 2 analyses | = 11                                  |                                                                                                                                       |

NOTE: R = Recurrent ovarian cancer.

NR = Non-recurrent ovarian cancer.

Ags = Antigens.

\* = Number of assays was < 10 because 1 NR patient had no baseline value and the other NR patient had no first post diagnosis interval value.

Please see Materials and Methods for the different Statistical analyses.

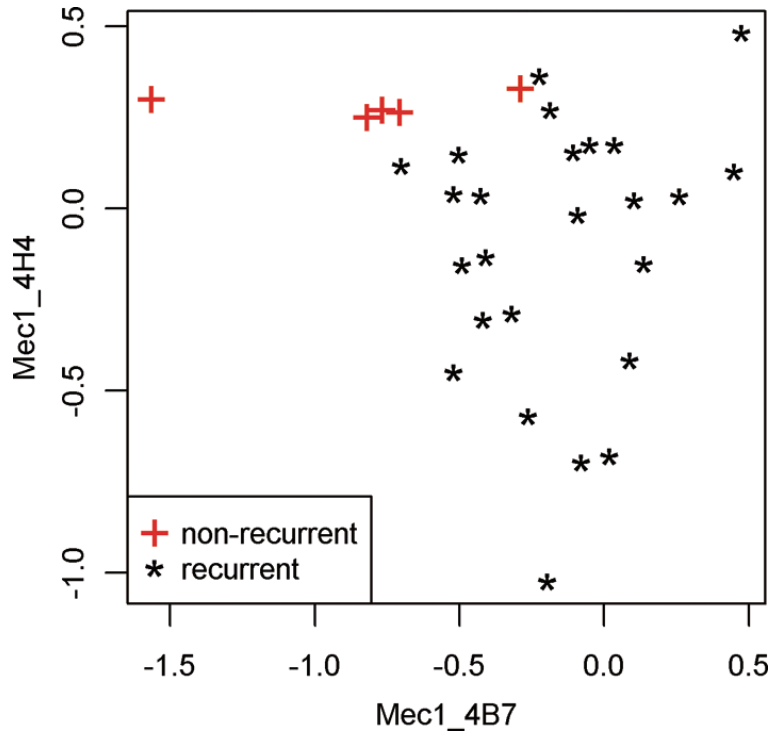

Supplementary Fig. S1. Graphical representation of ovarian cancer validation set by recurrence status. Recurrence status of the validation set is based on correlation between 2 antigens, Mec1\_4B7 and Mec1\_4H4.
